# Supplementary material for: Effect of molar mass of poly(2-oxazoline) based glycopolymers on lectin binding
Source: Royal Society of Chemistry journal article supplement (doi:10.1039/d4py01135j), 2024-01-01
Supplement: d4py01135j1.pdf [file d4py01135j1.pdf]

## Electronic Supporting Information

# Effect of Molar Mass of Poly(2-Oxazoline) Based Glycopolymers on Lectin Binding

Caitlin L A Nutting<sup>a</sup>, James Lefley<sup>a</sup>, Zivani Varanaraja,<sup>a</sup> Gokhan Yilmaz<sup>a</sup>, C. Remzi Becer<sup>a\*</sup>

<sup>a</sup>*Department of Chemistry, University of Warwick, Coventry, CV4 7AL, UK*

Corresponding author: E-mail: [remzi.becer@warwick.ac.uk](mailto:remzi.becer@warwick.ac.uk)

Website: [www.becergroup.com](http://www.becergroup.com)

### Table of Contents

|                                                                    |    |
|--------------------------------------------------------------------|----|
| Monomer Synthesis of 2-(3-butenyl-2-oxazoline).....                | 2  |
| Kinetic Information of the CROP of 2-(3-butenyl-2-oxazoline) ..... | 3  |
| NMR, MALDI-ToF and GPC traces <b>P1-P6</b> .....                   | 4  |
| <sup>1</sup> H NMR, IR traces GPC traces <b>GP1-GP5</b> .....      | 10 |
| SPR sensorgrams of negative control <b>P6</b> .....                | 20 |

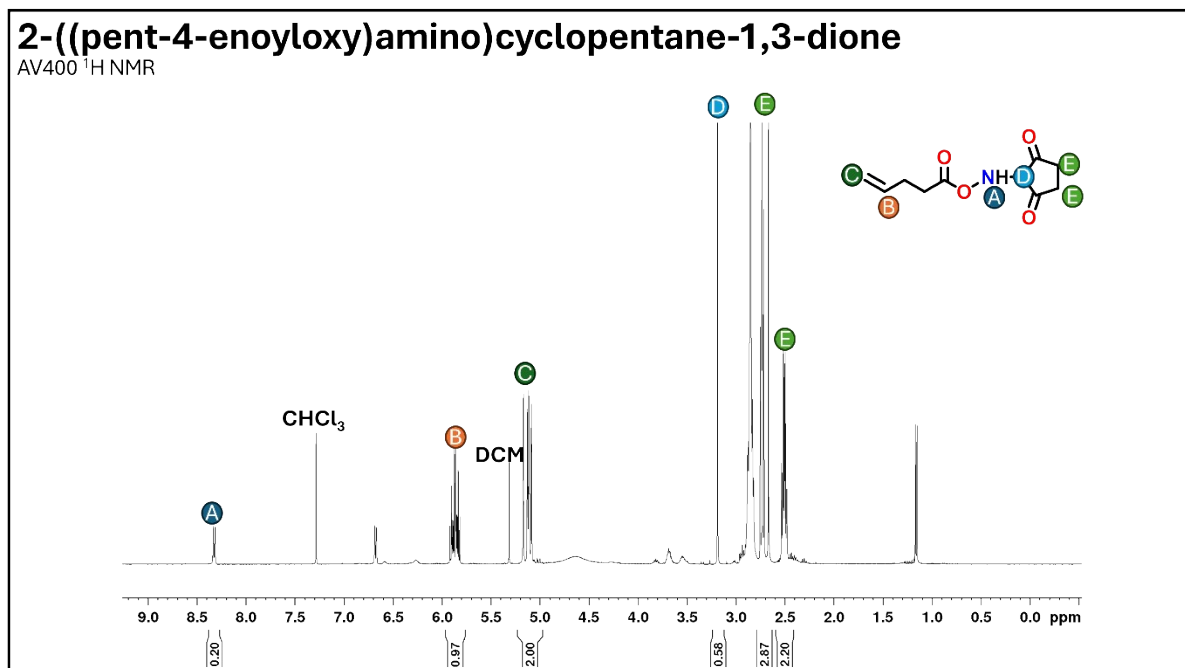

**Figure S1:** The assigned <sup>1</sup>H NMR of step one of the synthesis of 2-(3-butenyl-2-oxazoline) (CDCl<sub>3</sub>, 400 MHz)

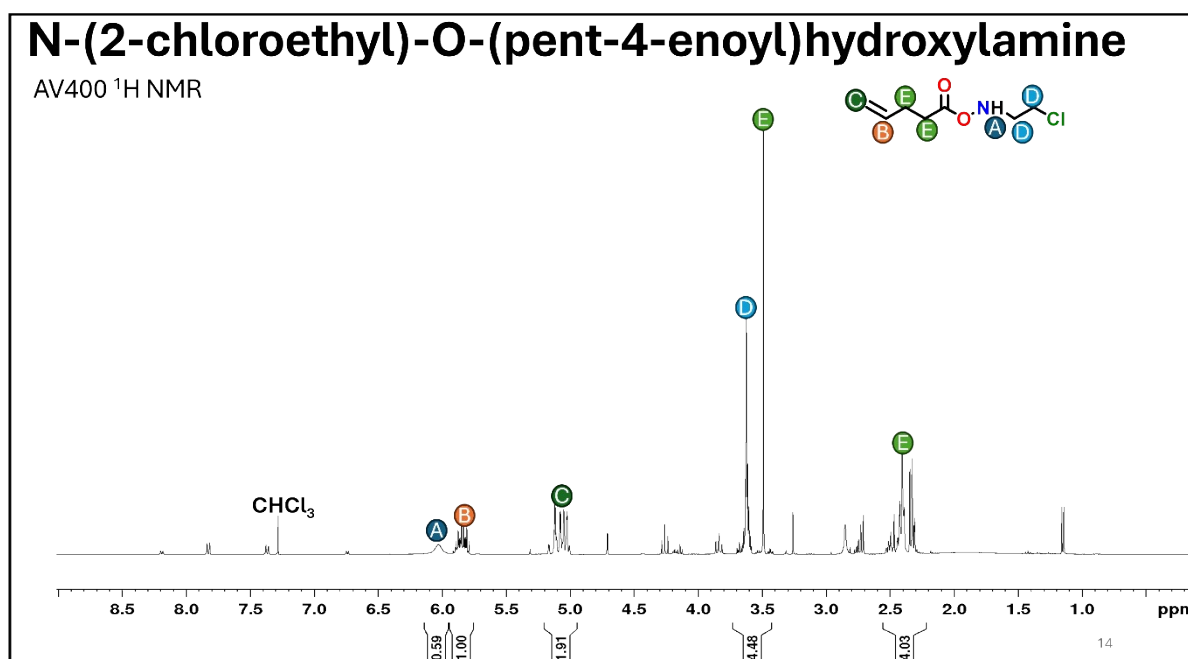

**Figure S2:** The assigned <sup>1</sup>H NMR of step two of the synthesis of 2-(3-butenyl-2-oxazoline) (CDCl<sub>3</sub>, 400 MHz).

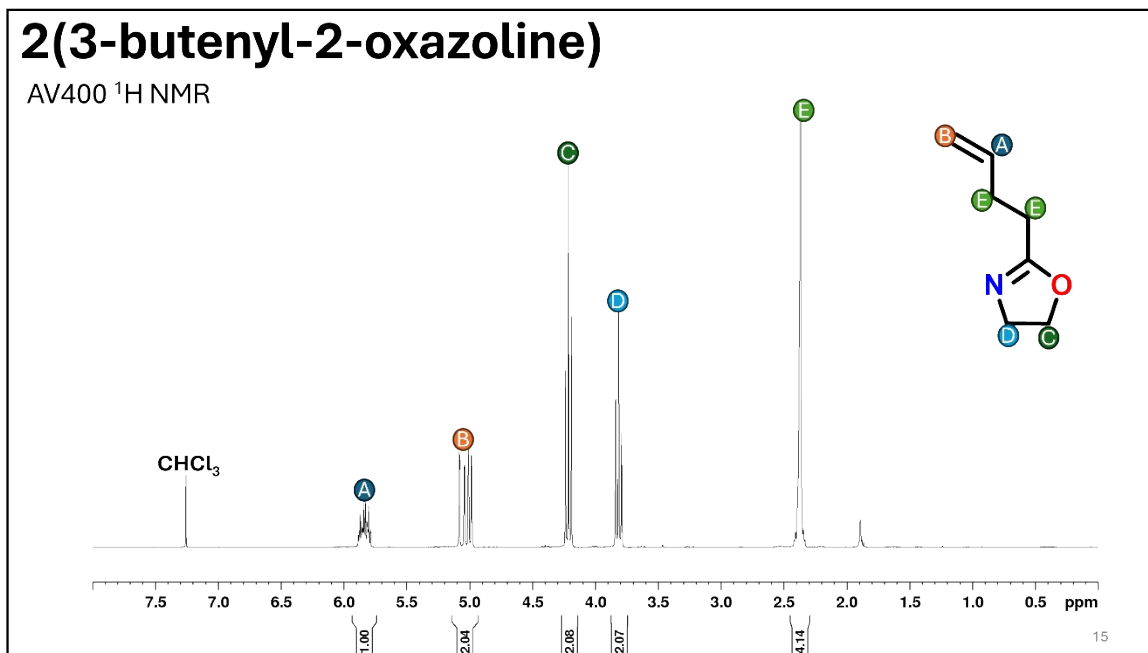

**Figure S3:** The assigned <sup>1</sup>H NMR of the purified 2-(3-butenyl-2-oxazoline) (CDCl<sub>3</sub>, 400 MHz).

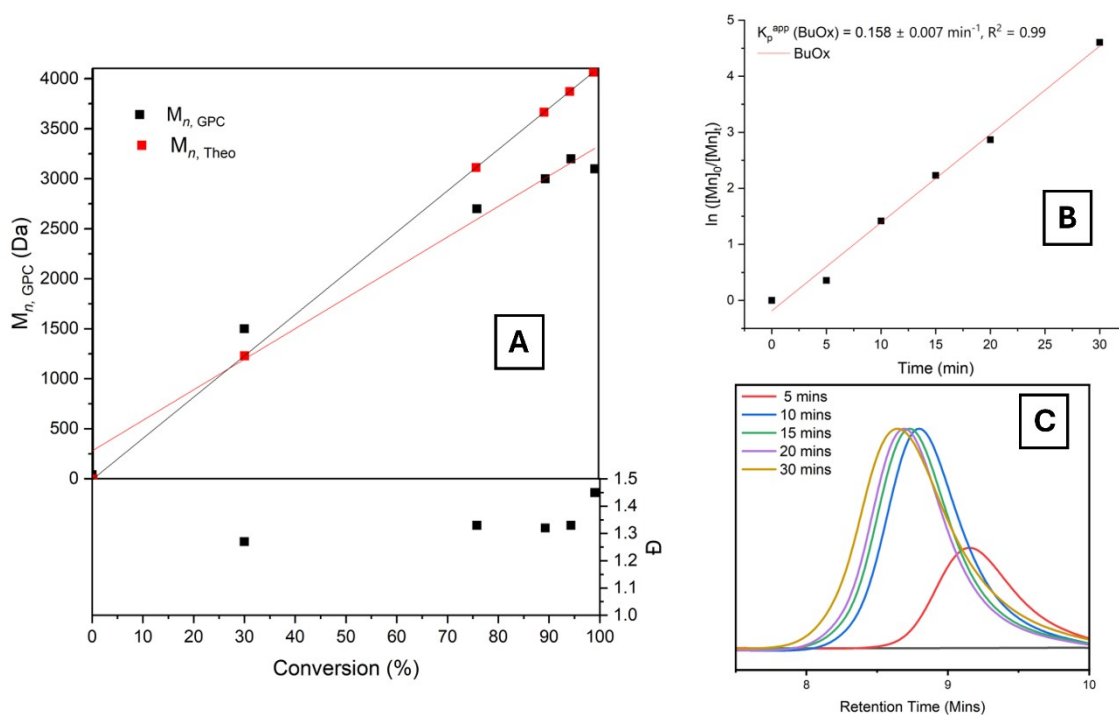

**Figure S4:** The kinetic plots of 2-(3-Butenyl-2-oxazoline) at 110 °C in acetonitrile. The plots demonstrate a linear first-order kinetic characteristic of living polymerisation. **(A)** Evolution of molecular weight and dispersity over conversion of the CROP reaction. **(B)** Semi-logarithmic plot of ButeneOx at 110 °C in acetonitrile. **(C)** Evolution of GPC traces over different time points measured (eluent: THF +2 % TEA +0.1 % BHT).

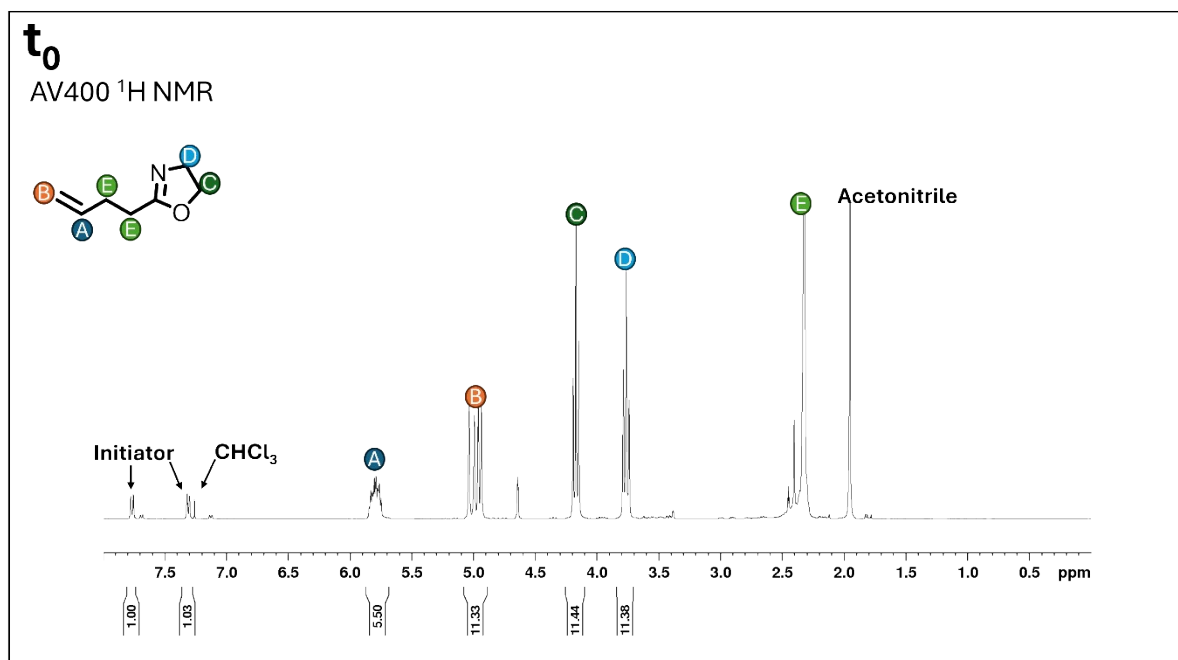

**Figure S5:** The assigned t<sub>0</sub> <sup>1</sup>H NMR spectrum of the stock solution used for each first block of **P1-P5** which include 2-(3-butenyl-2-oxaoline) and MeCN this was initiated with propargyl tosylate and after 22 mins EtOx was added in varying amounts depending on the chain length desired (CDCl<sub>3</sub>, 400 MHz).

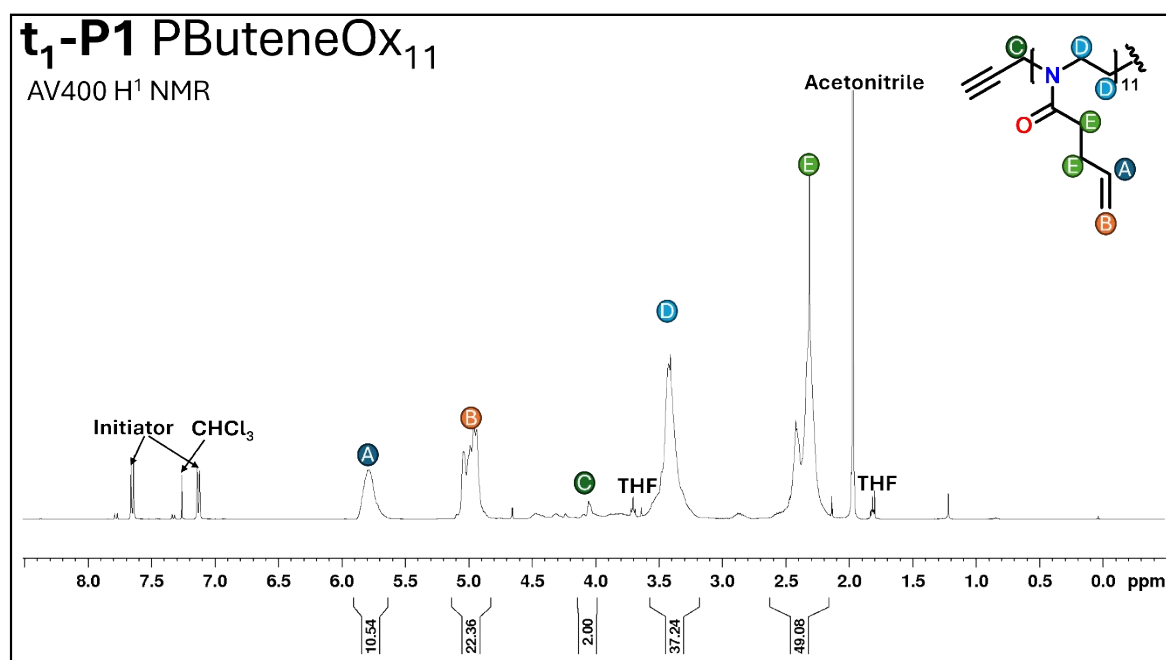

**Figure S6:** Example assigned t<sub>1</sub> <sup>1</sup>H NMR Spectrum of **P1** at the point before the addition of EtOx, (CDCl<sub>3</sub>, 400 MHz).

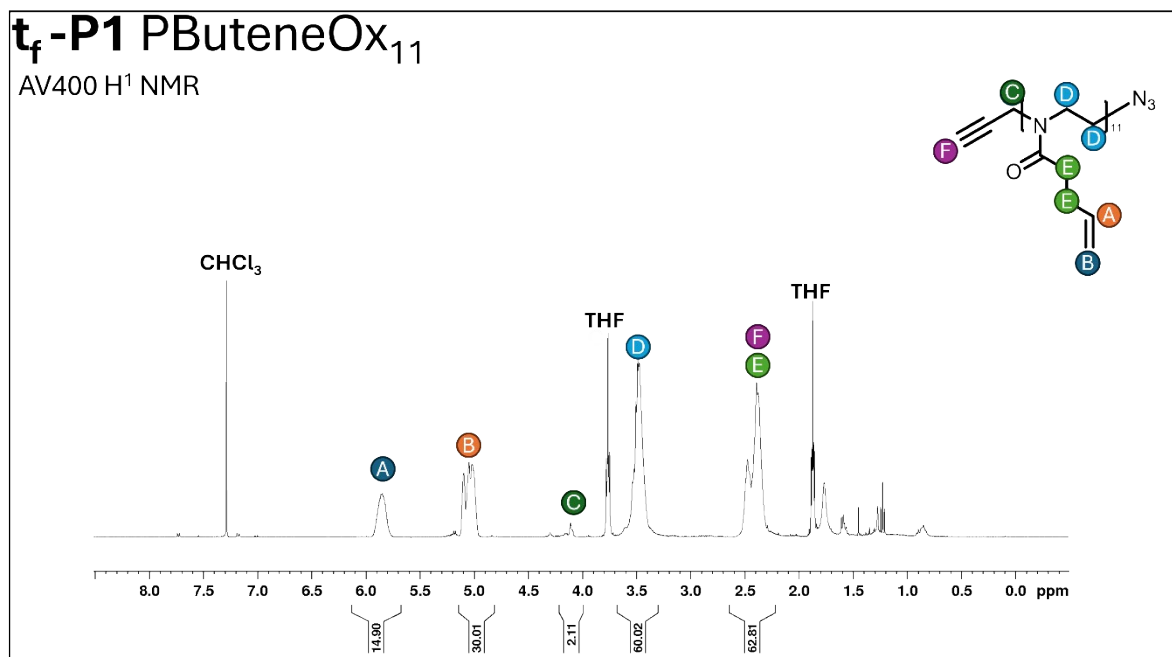

**Figure S7:** The assigned  $t_f$  <sup>1</sup>H NMR Spectrum of **P1** (CDCl<sub>3</sub>, 400 MHz).

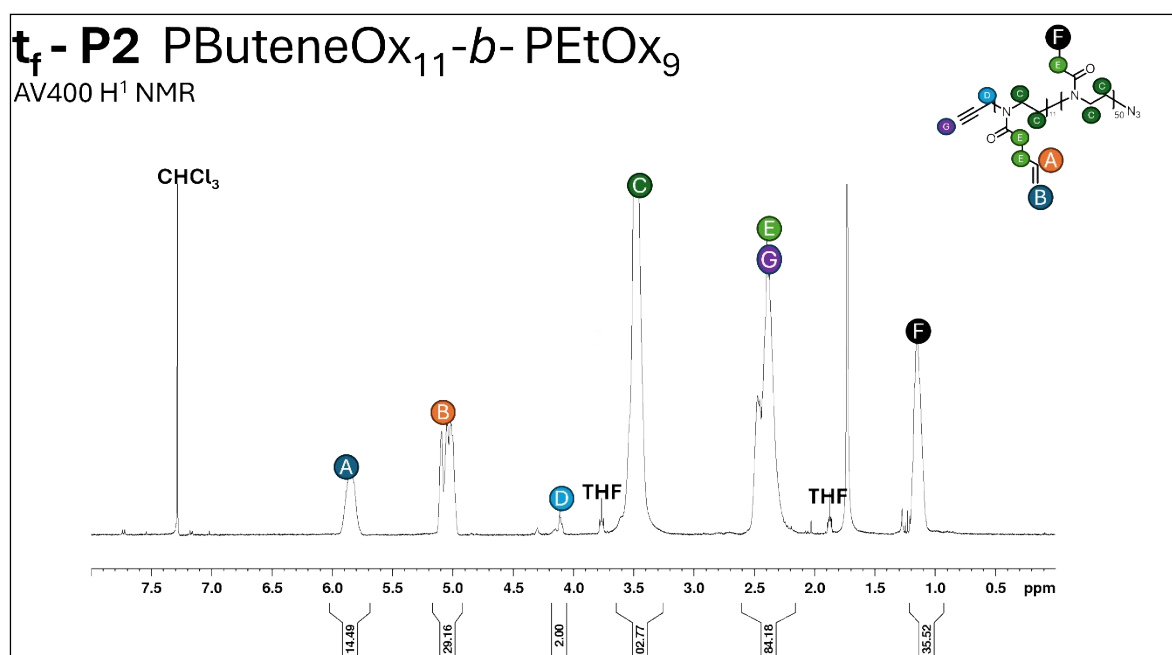

**Figure S8:** The assigned  $t_f$  <sup>1</sup>H NMR Spectrum of **P2**(CDCl<sub>3</sub>, 400 MHz).

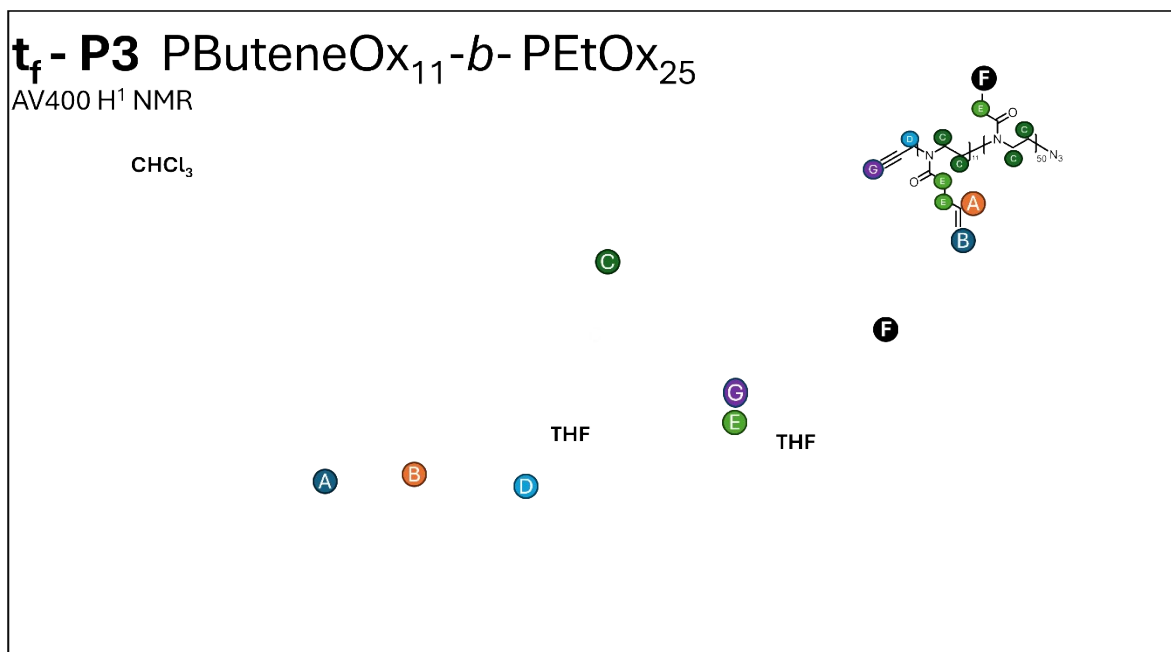

**Figure S9:** The assigned t<sub>f</sub> <sup>1</sup>H NMR Spectrum of **P3**(CDCl<sub>3</sub>, 400 MHz).

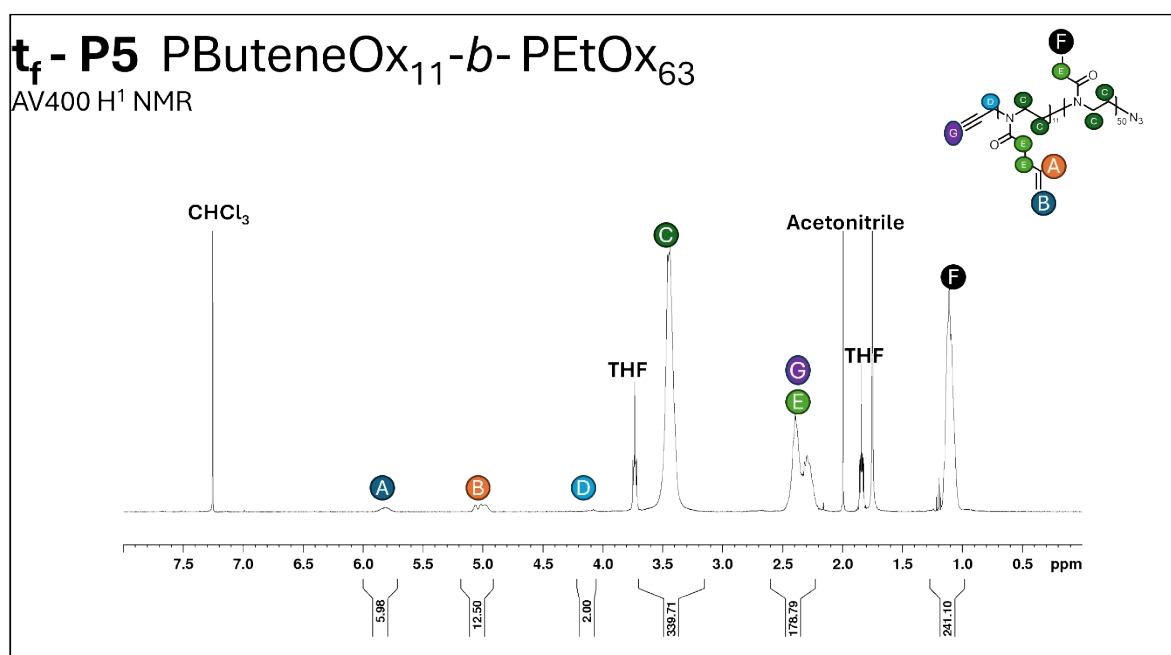

**Figure S10:** The assigned t<sub>f</sub> <sup>1</sup>H NMR Spectrum of **P5**(CDCl<sub>3</sub>, 400 MHz).

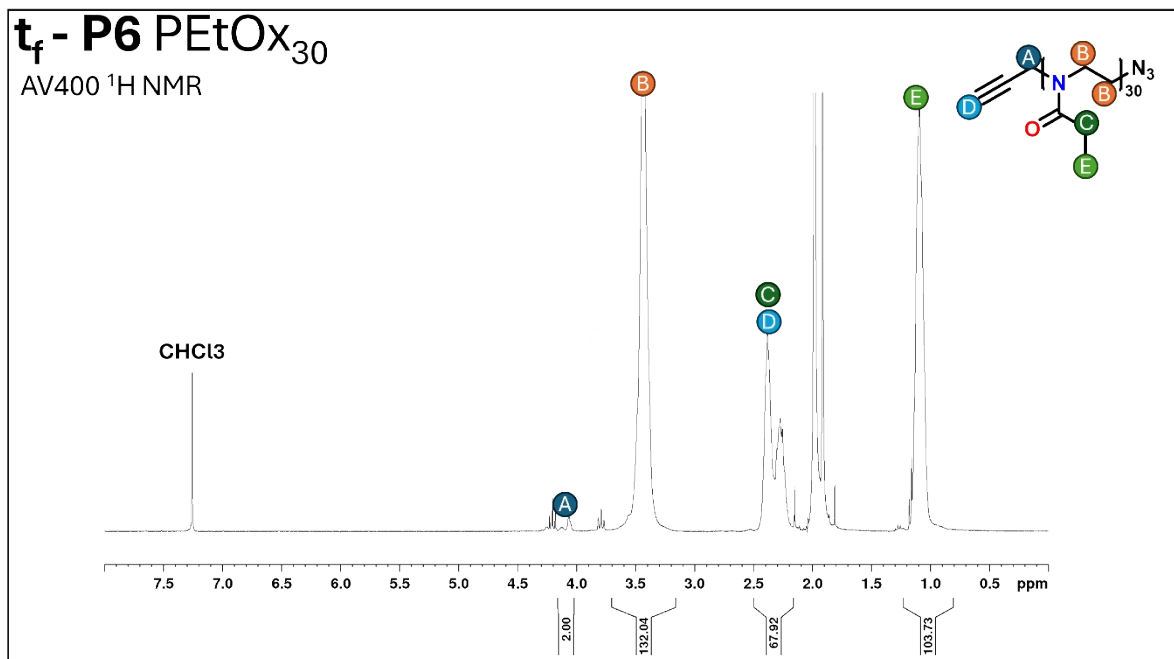

**Figure S11:** The assigned t<sub>f</sub> <sup>1</sup>H NMR Spectrum of P6(CDCl<sub>3</sub>, 400 MHz).

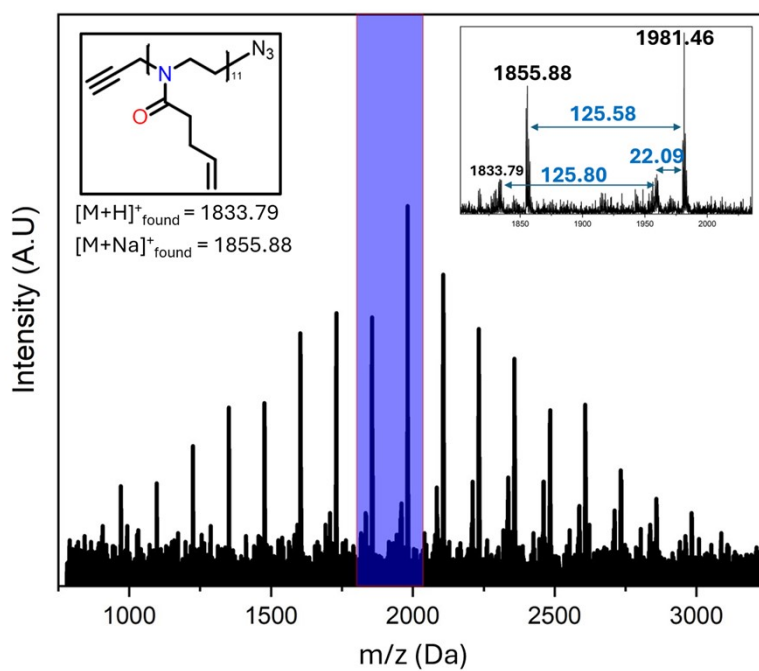

**Figure S12:** MALDI-ToF MS of P1. Confirming the telechelic structure.

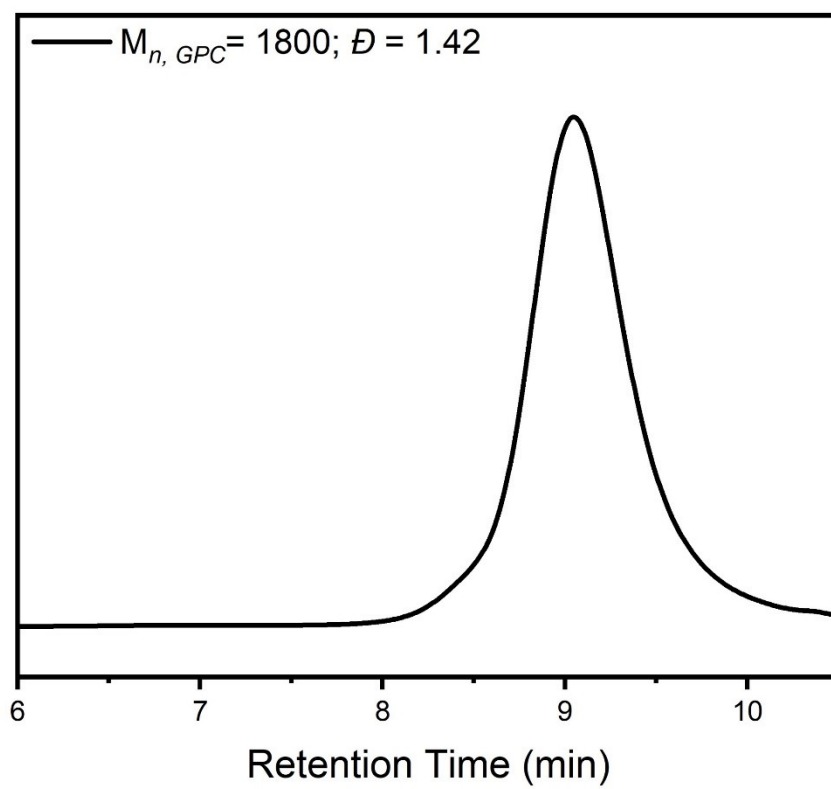

**Figure S13:** GPC chromatogram of **P1**. The GPC was carried out in THF.



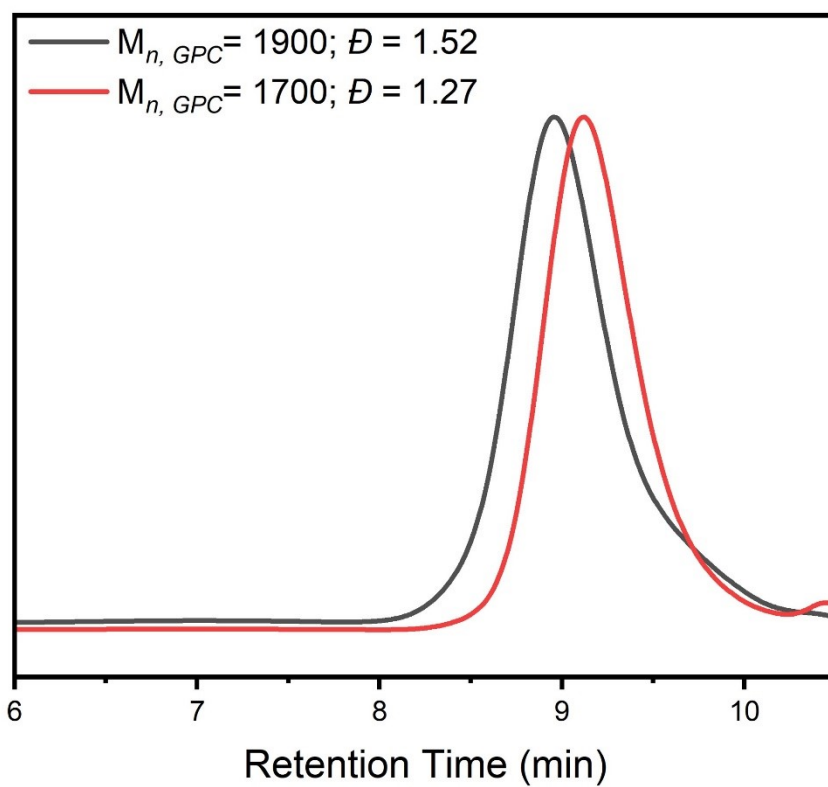

**Figure S14:** GPC chromatogram of **P2**. With the red trace showing the 1<sup>st</sup> block of the polymer and the black trace showing the addition of the 2<sup>nd</sup> block. The GPC was carried out in THF.

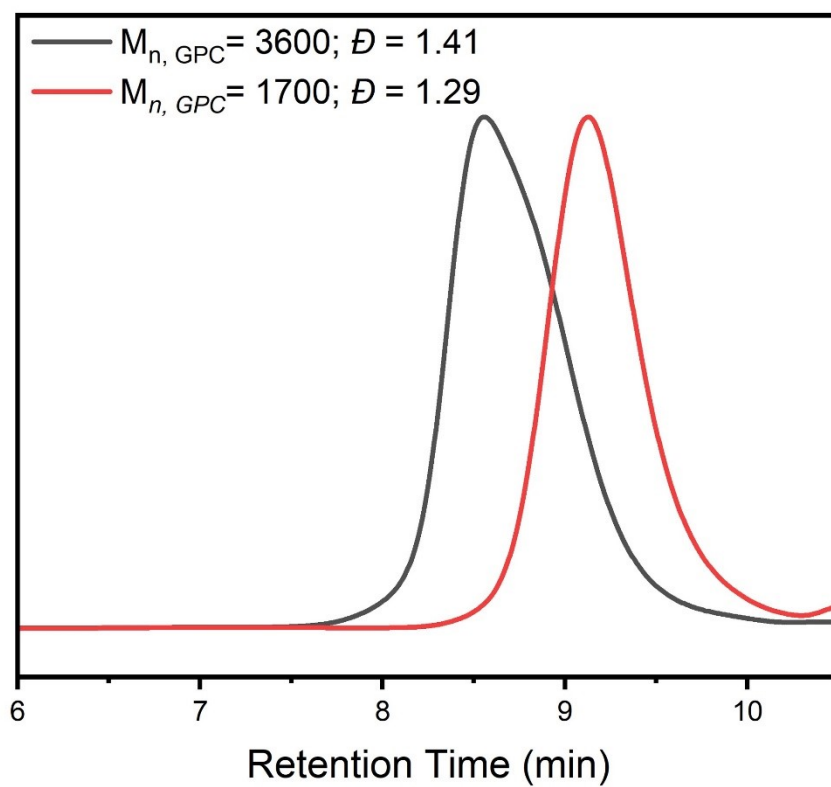

**Figure S15:** GPC chromatogram of **P3**. With the red trace showing the 1<sup>st</sup> block of the polymer and the black trace showing the addition of the 2<sup>nd</sup> block. The GPC was carried out in THF.

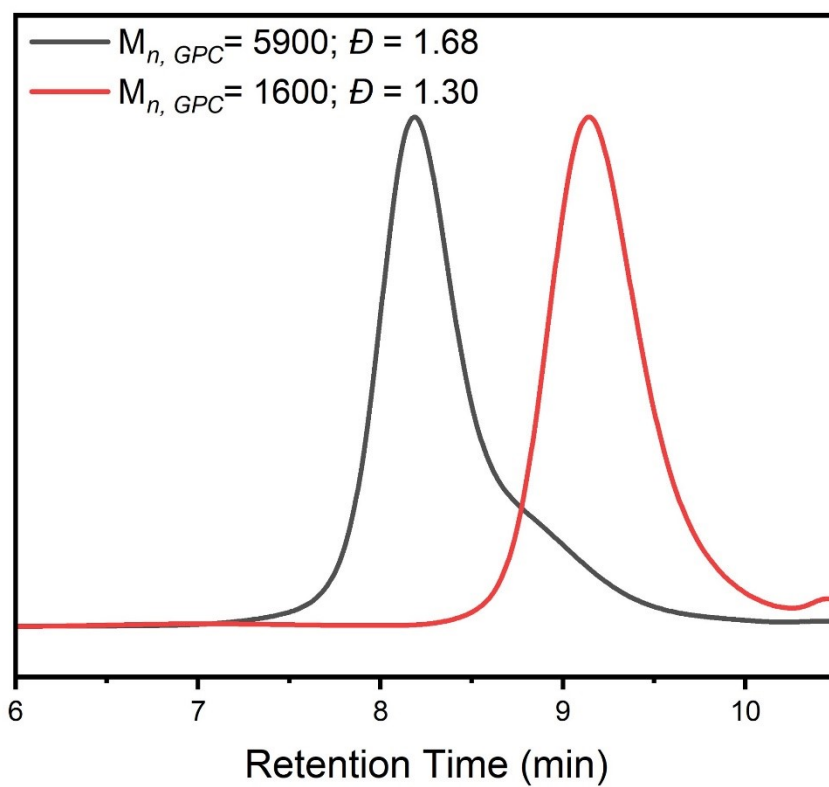

**Figure S16:** GPC chromatogram of **P4**. With the red trace showing the 1<sup>st</sup> block of the polymer and the black trace showing the addition of the 2<sup>nd</sup> block. The GPC was carried out in THF.

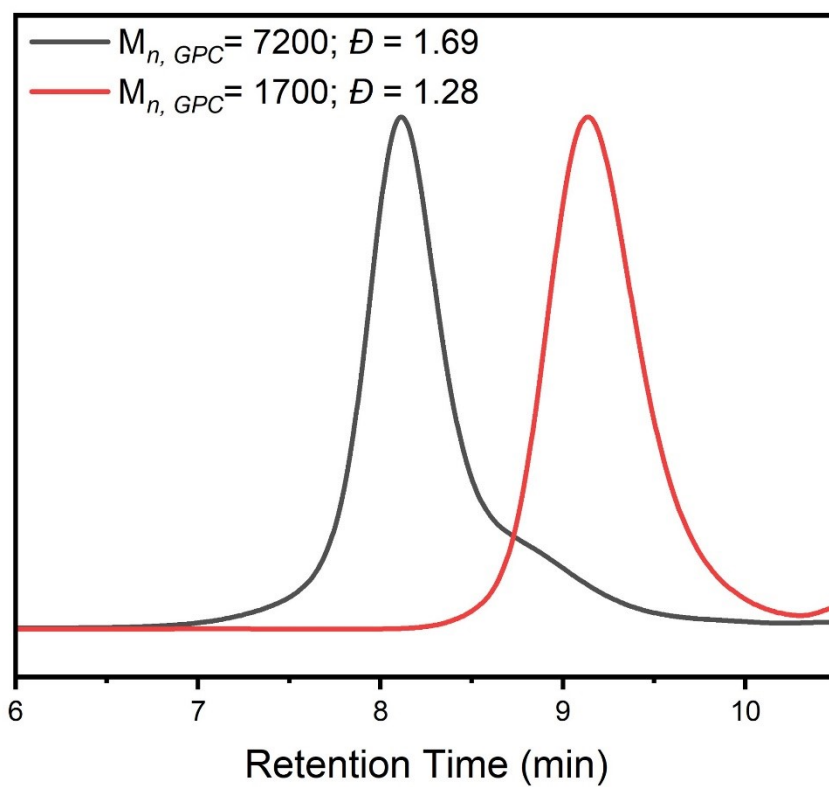

**Figure S17:** GPC chromatogram of **P5**. With the red trace showing the 1<sup>st</sup> block of the polymer and the black trace showing the addition of the 2<sup>nd</sup> block. The GPC was carried out in THF.

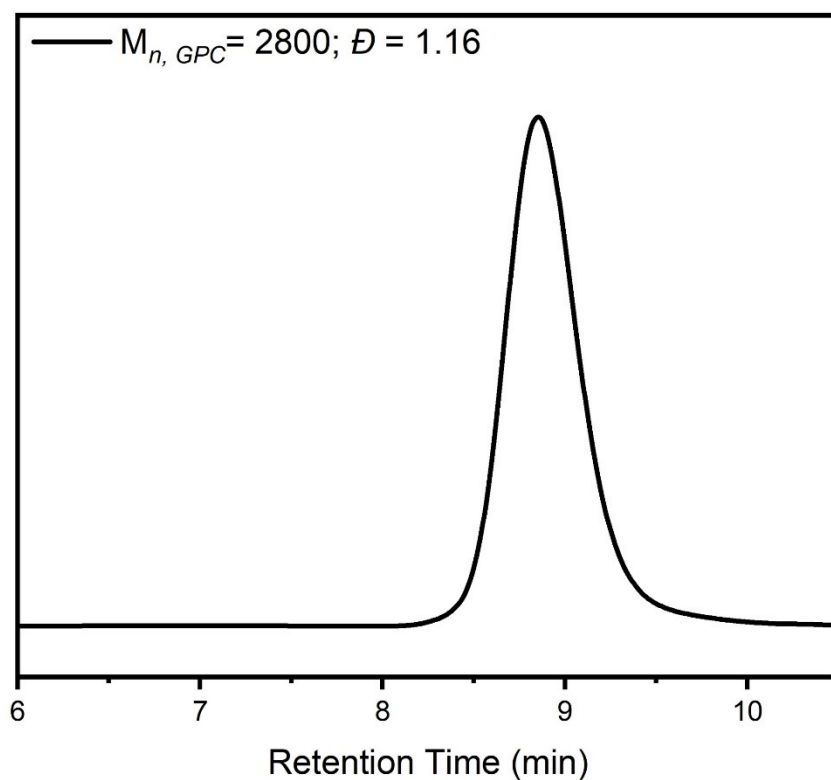

**Figure S18:** GPC chromatogram of **P6**. The GPC was carried out in THF.

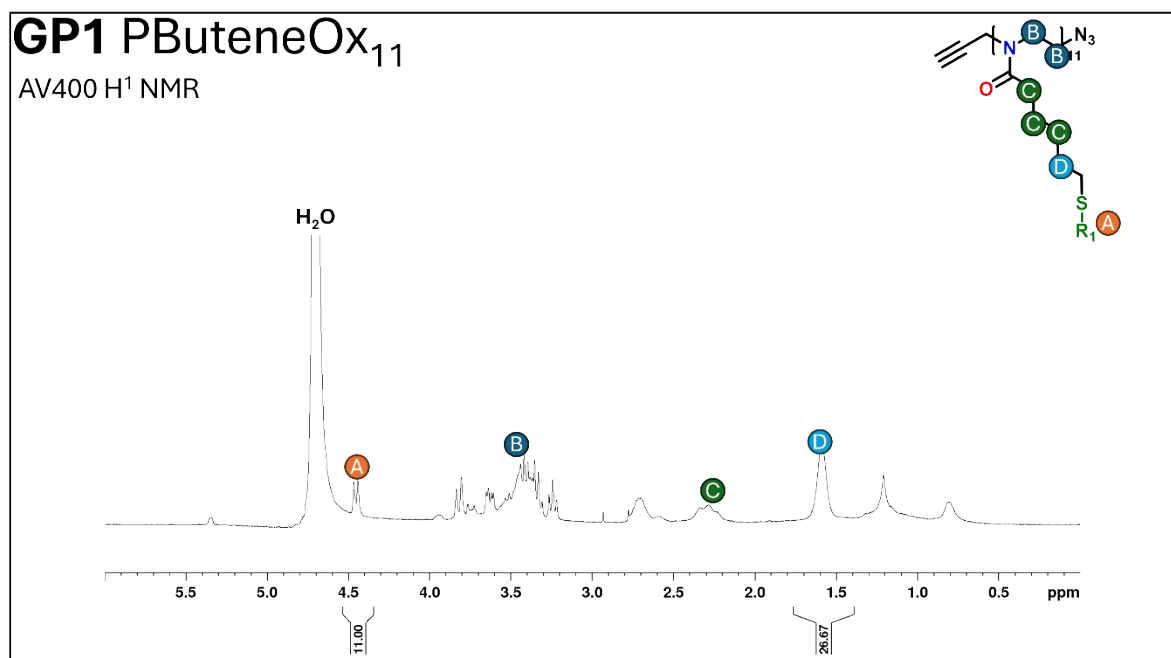

**Figure S19:** The assigned final <sup>1</sup>H NMR Spectrum of **GP1** (D<sub>2</sub>O 400 MHz).

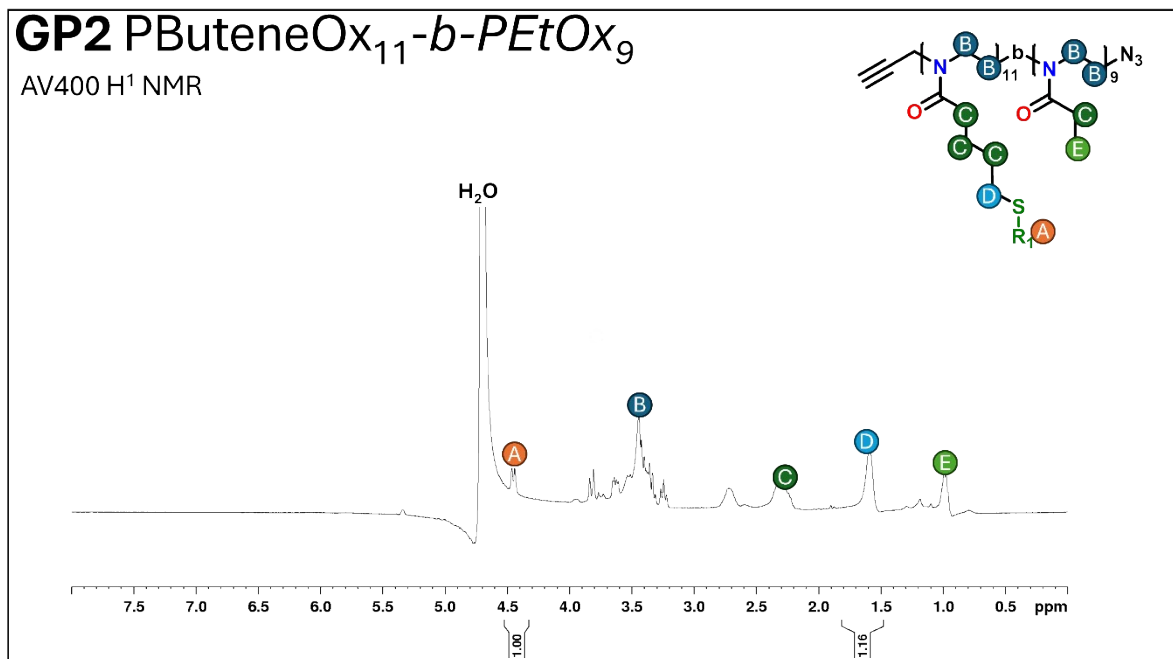

**Figure S20:** The assigned final <sup>1</sup>H NMR Spectrum of **GP2** (D<sub>2</sub>O 400 MHz).

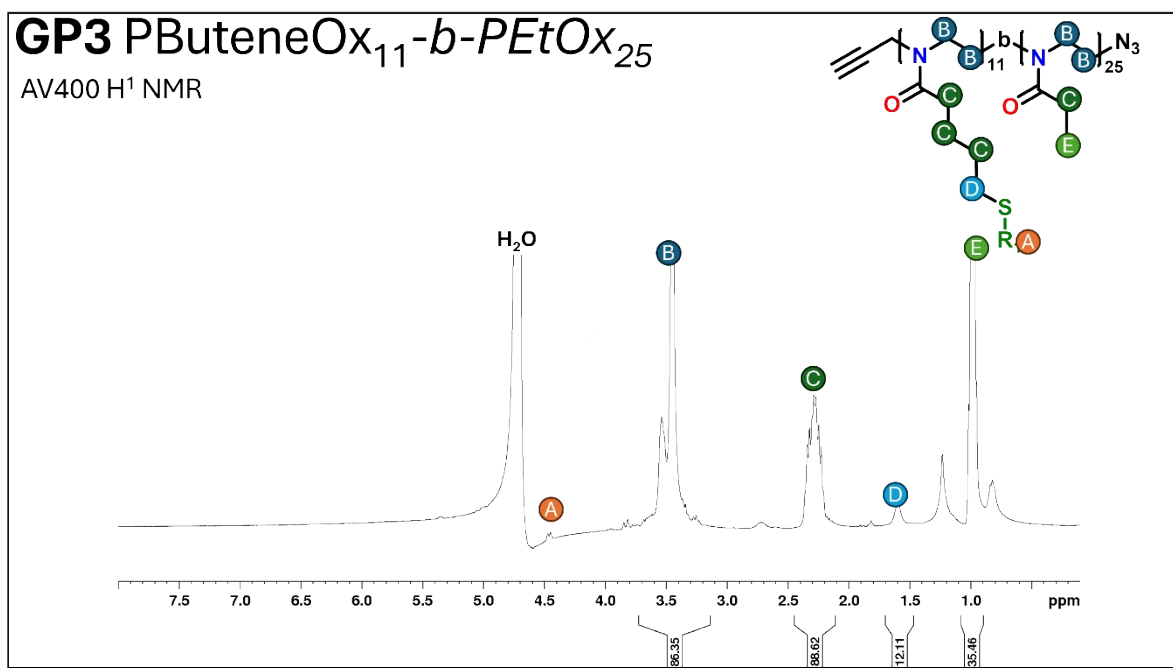

**Figure S21:** The assigned final <sup>1</sup>H NMR Spectrum of **GP3** (D<sub>2</sub>O 400 MHz).

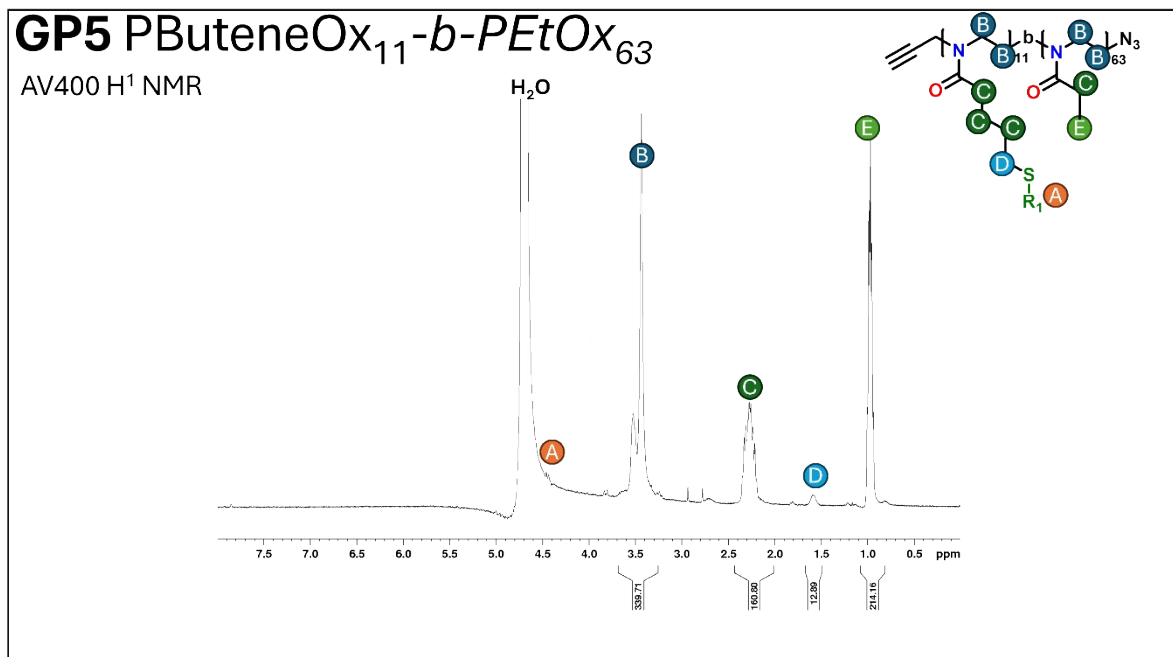

**Figure S22:** The assigned final <sup>1</sup>H NMR Spectrum of **GP5** (D<sub>2</sub>O 400 MHz).

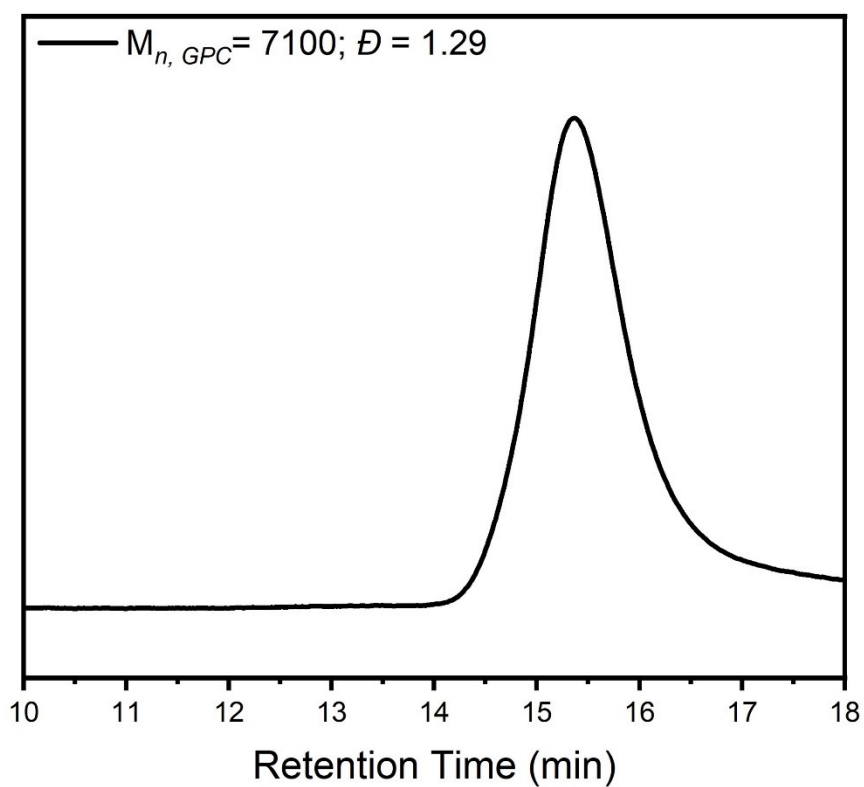

**Figure S23:** GPC chromatogram of the final **GP1**. The GPC was carried out in DMF.

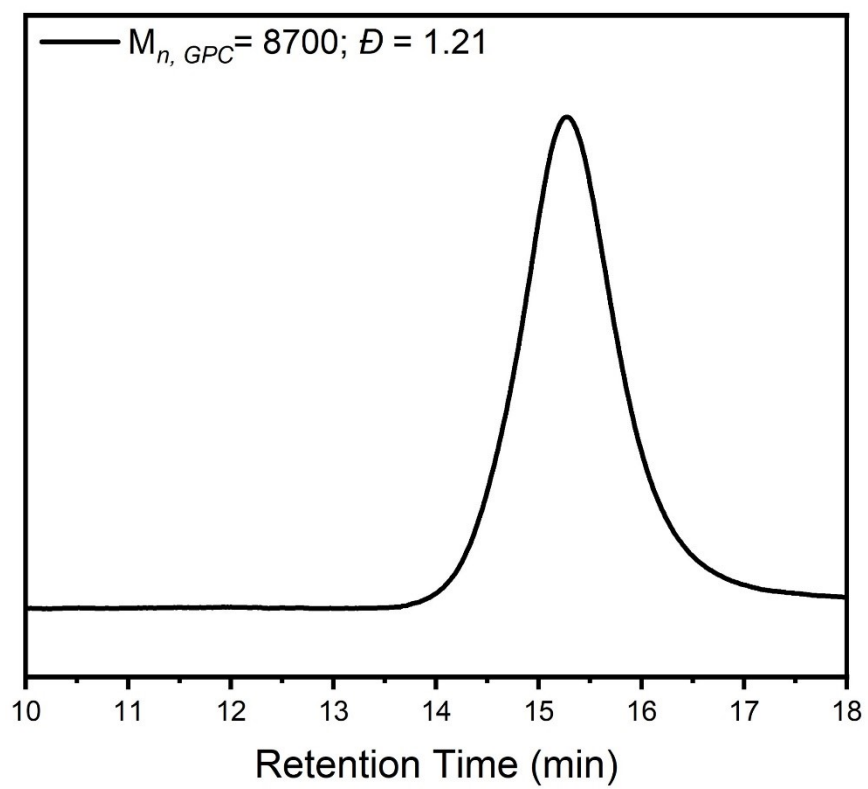

**Figure S24:** GPC chromatogram of the final **GP2**. The GPC was carried out in DMF.



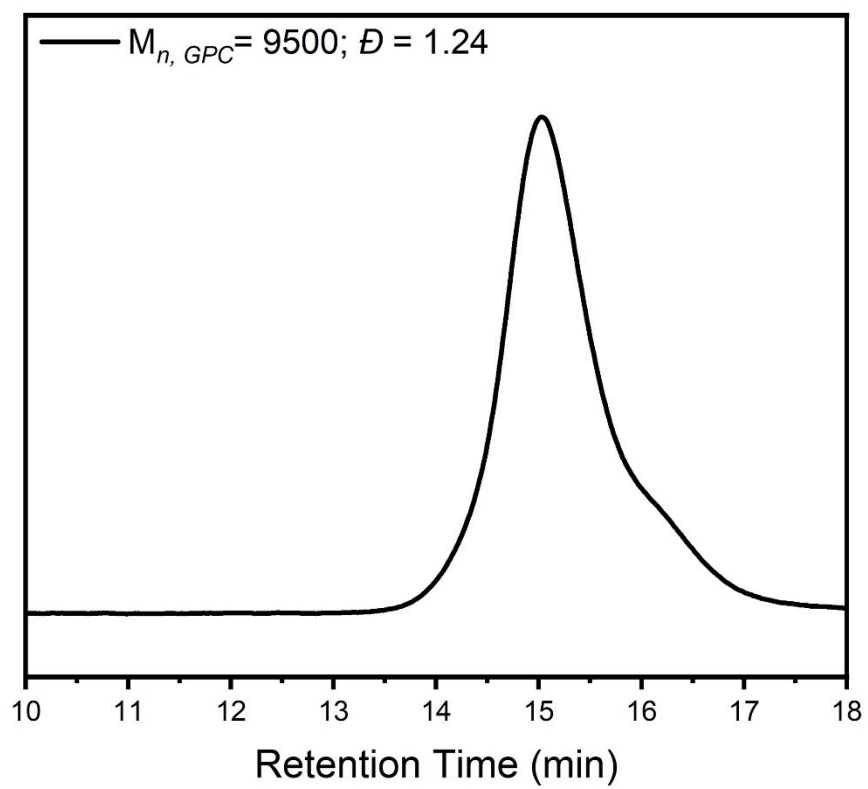

**Figure S25:** GPC chromatogram of the final **GP3**. The GPC was carried out in DMF.

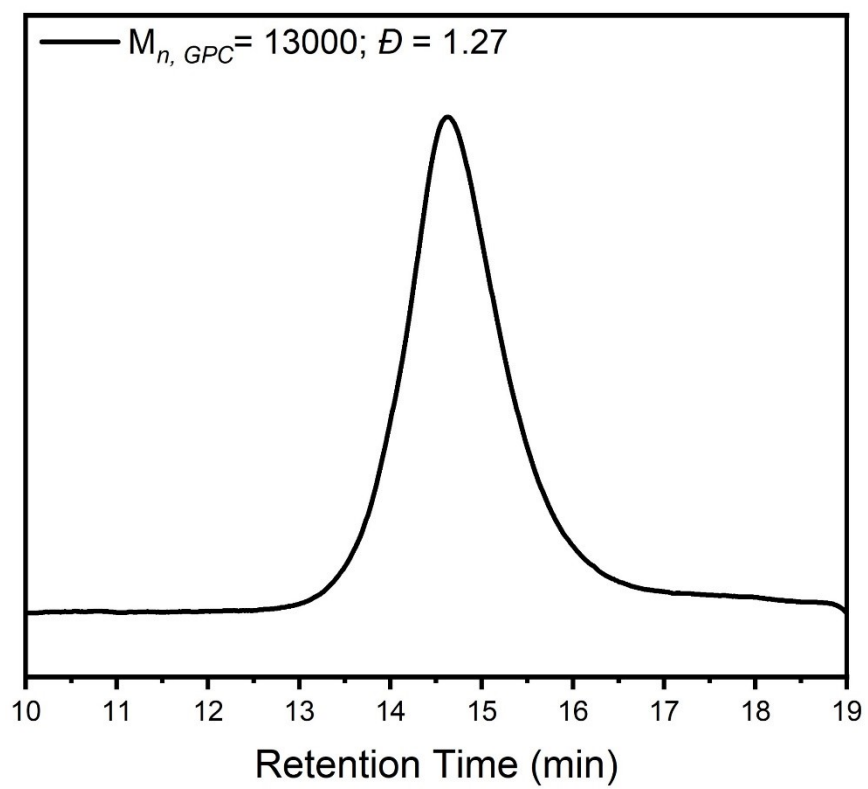

**Figure S26:** GPC chromatogram of the final GP4. The GPC was carried out in DMF.

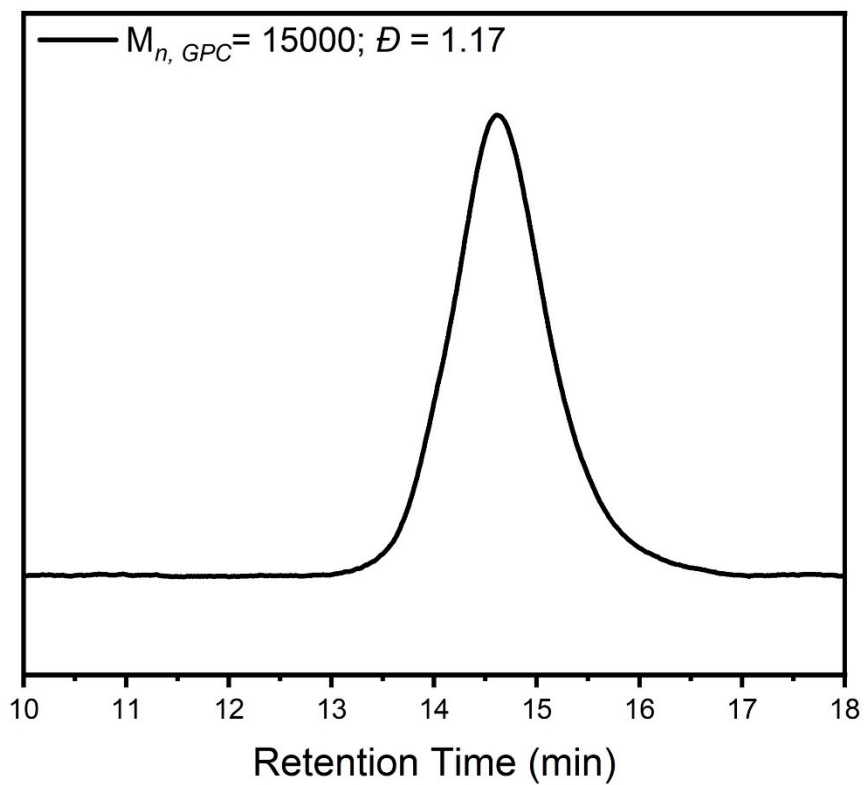

**Figure S27:** GPC chromatogram of the final **GP5**. The GPC was carried out in DMF.

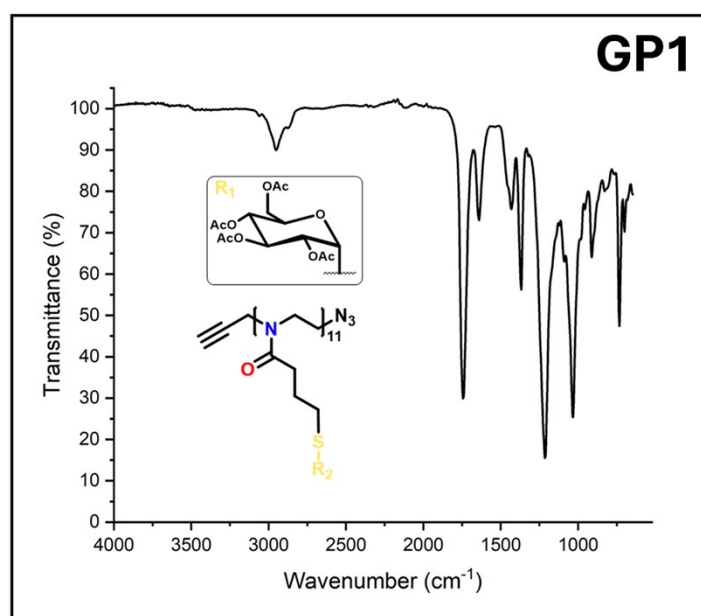

**Figure S28:** FT-IR spectrum of **GP1** before deacetylation.

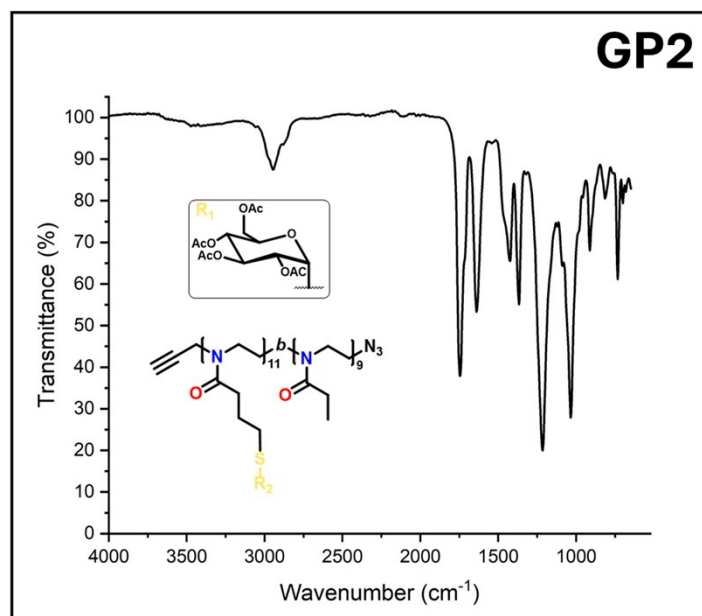

**Figure S29:** FT-IR spectrum of **GP2** before deacetylation.

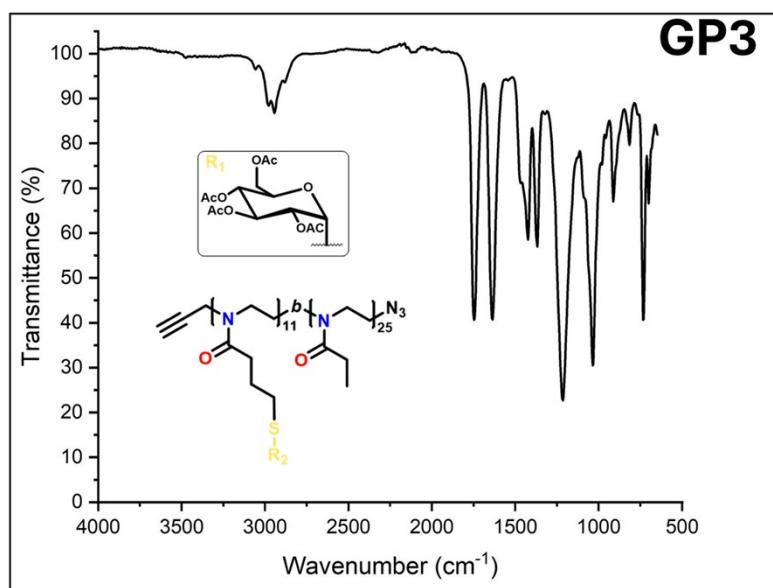

**Figure S30:** FT-IR spectrum of **GP3** before deacetylation.

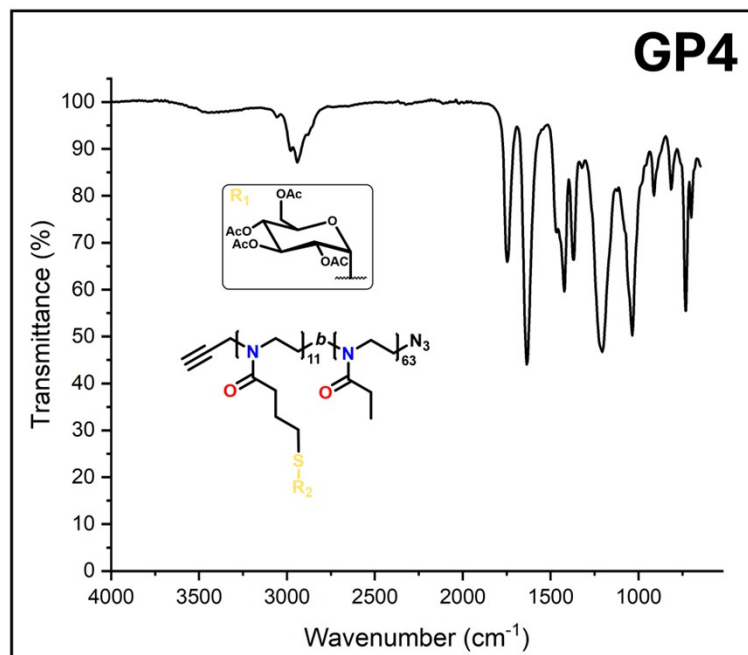

**Figure S31:** FT-IR spectrum of **GP4** before deacetylation.

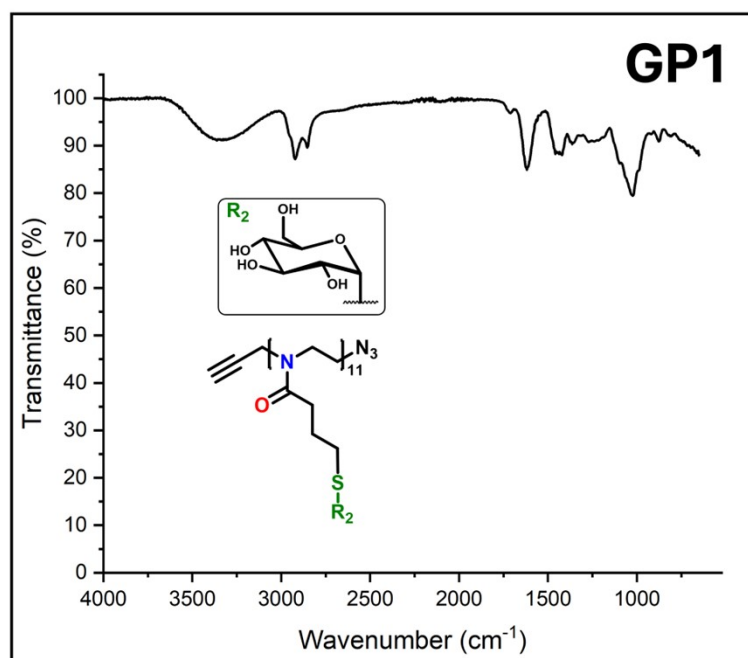

**Figure S32:** FT-IR spectrum of **GP1** after deacetylation.

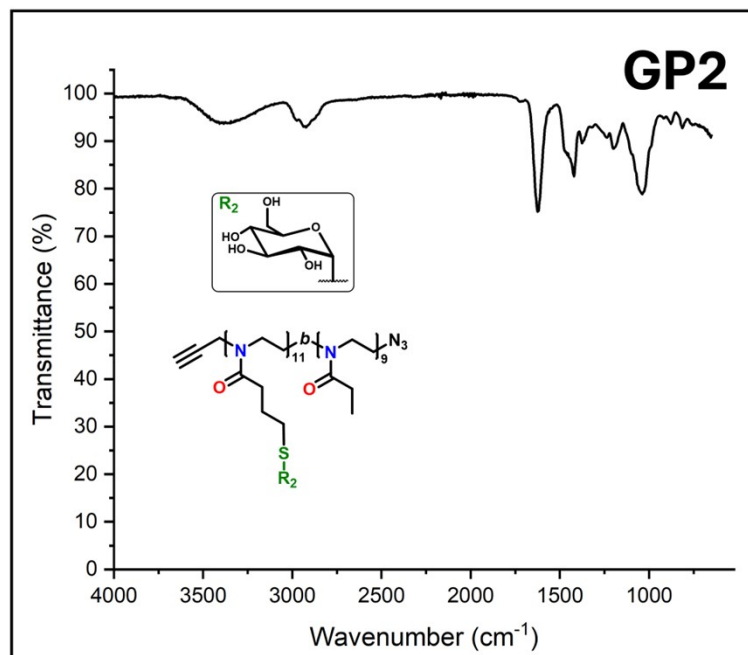

**Figure S33:** FT-IR spectrum of **GP2** after deacetylation.

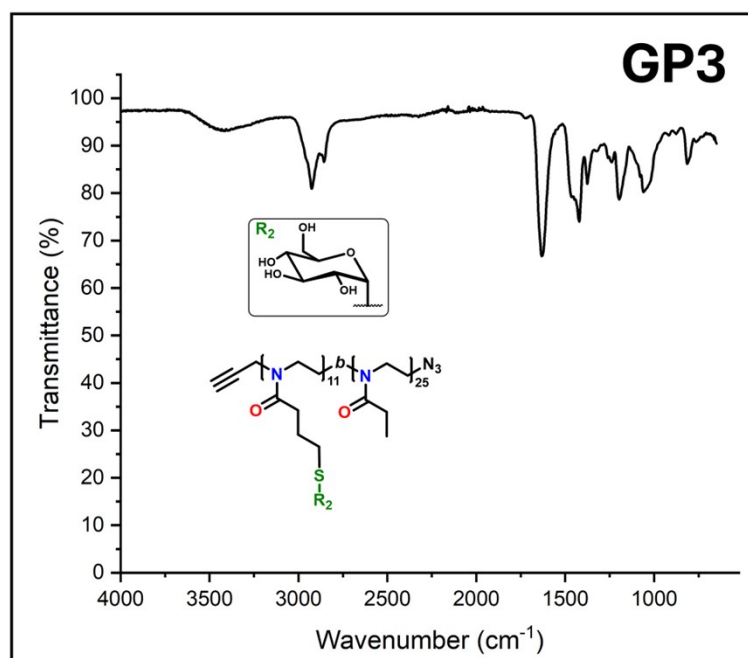

**Figure S34:** FT-IR spectrum of **GP3** after deacetylation.

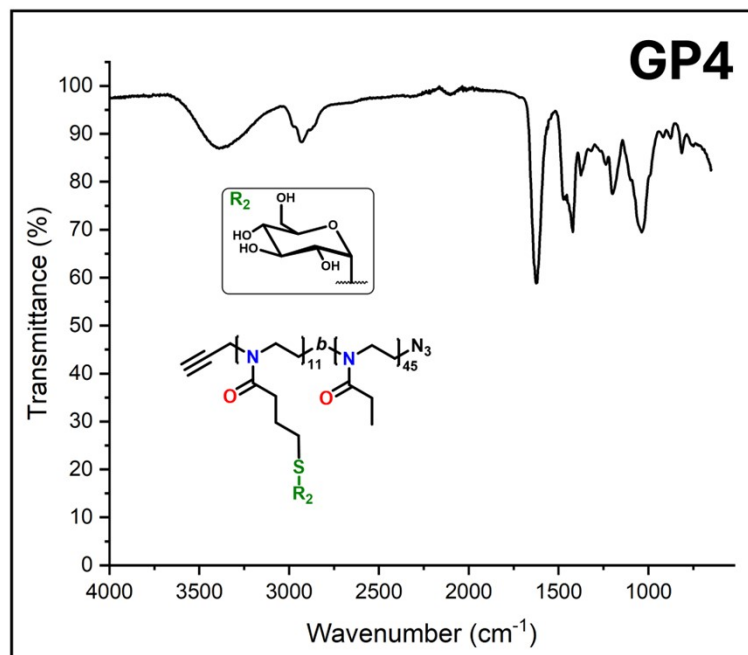

**Figure S35:** FT-IR spectrum of **GP4** after deacetylation.

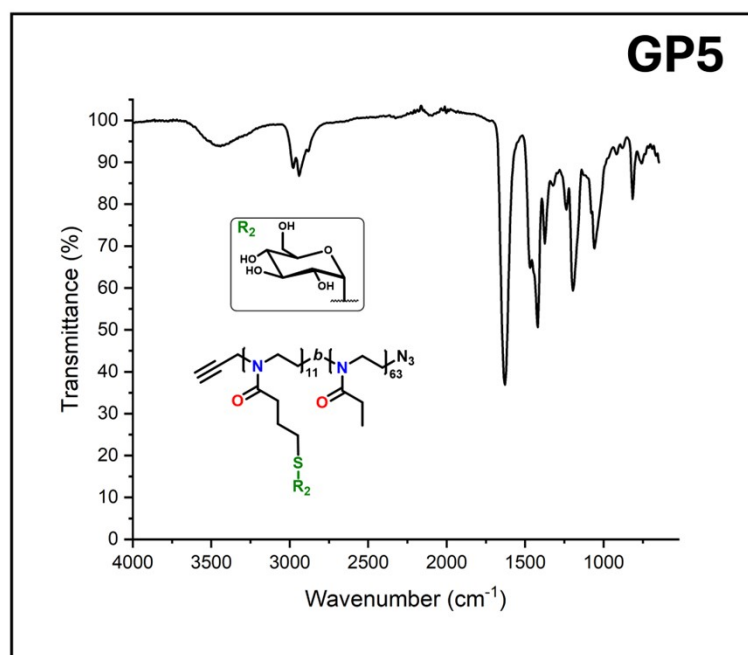

**Figure S36:** FT-IR spectrum of **GP5** after deacetylation.

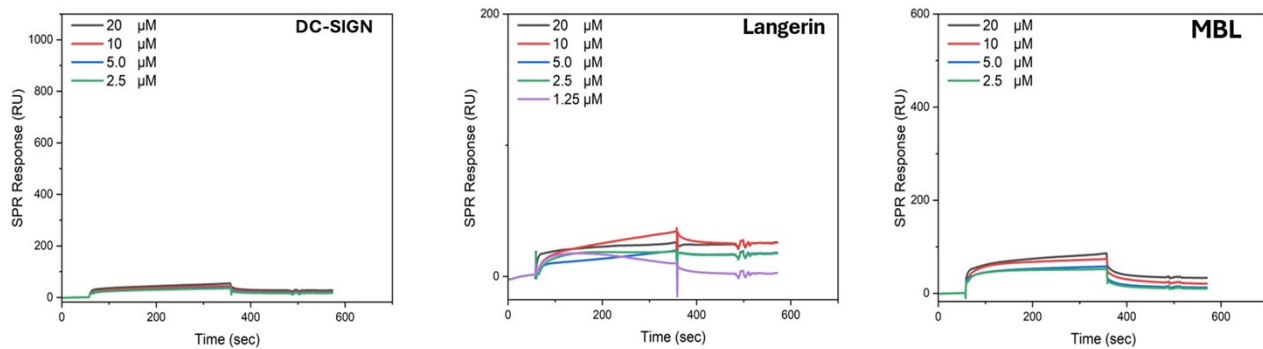

**Figure S37:** SPR binding curves of the negative control **P6** against the lectins DC-SIGN, MBL and Langerin.
